# Supplementary material for: Nature of E–E bonds in heavier ditetrel alkyne analogues ArEEAr (Ar = C6H3-2,6(C6H3-2,6-Pri2)2; E = Si, Ge, Sn, and Pb)
Source: Royal Society of Chemistry journal article supplement (doi:10.1039/c3nj00600j), 2013-01-01
Supplement: c3nj00600j.pdf [file c3nj00600j.pdf]

*Electronic Supplementary Material (ESI) for New Journal of Chemistry*

*This journal is © The Royal Society of Chemistry and The Centre National de la Recherche Scientifique 2013*

*Supporting information For*

**Nature of E-E bond in heavier ditetrel alkyne analogues ArEEAr (Ar = C<sub>6</sub>H<sub>3</sub>-2,6(C<sub>6</sub>H<sub>3</sub>-2,6-Pr<sup>i</sup>)<sub>2</sub>; E = Si, Ge, Sn, and Pb)**

Suhong Huo<sup>a,b</sup> Xiaoyan Li<sup>a,\*</sup> Yanli Zeng<sup>a</sup> Zheng Sun<sup>a</sup> Shijun Zheng<sup>a</sup>  
Lingpeng Meng<sup>a,\*</sup>

*a. College of Chemistry and Material Science, Hebei Normal University,  
Road East of 2nd Ring South, Shijiazhuang, 050024, China*

*b. College of Chemical and Materials Engineering, Yanching Institute of  
Technology, Road North of Yingbin, Yanjiao National High-tech Industry  
Development Zone, 101601, China*

**Table of contents:**

**Fig. S1.** Electron localization functions for ArEEAr (Ar = C<sub>6</sub>H<sub>3</sub>-2,6(C<sub>6</sub>H<sub>3</sub>-2,6-Pr<sup>i</sup>)<sub>2</sub>, E = C, Si, Ge, Sn, Pb) on the line connecting two E-E atoms.

**Table S1.** Cartesian coordinates of the optimized structure of ArEEAr (Ar = C<sub>6</sub>H<sub>3</sub>-2,6(C<sub>6</sub>H<sub>3</sub>-2,6-Pr<sup>i</sup>)<sub>2</sub>, E = C, Si, Ge, Sn, Pb).

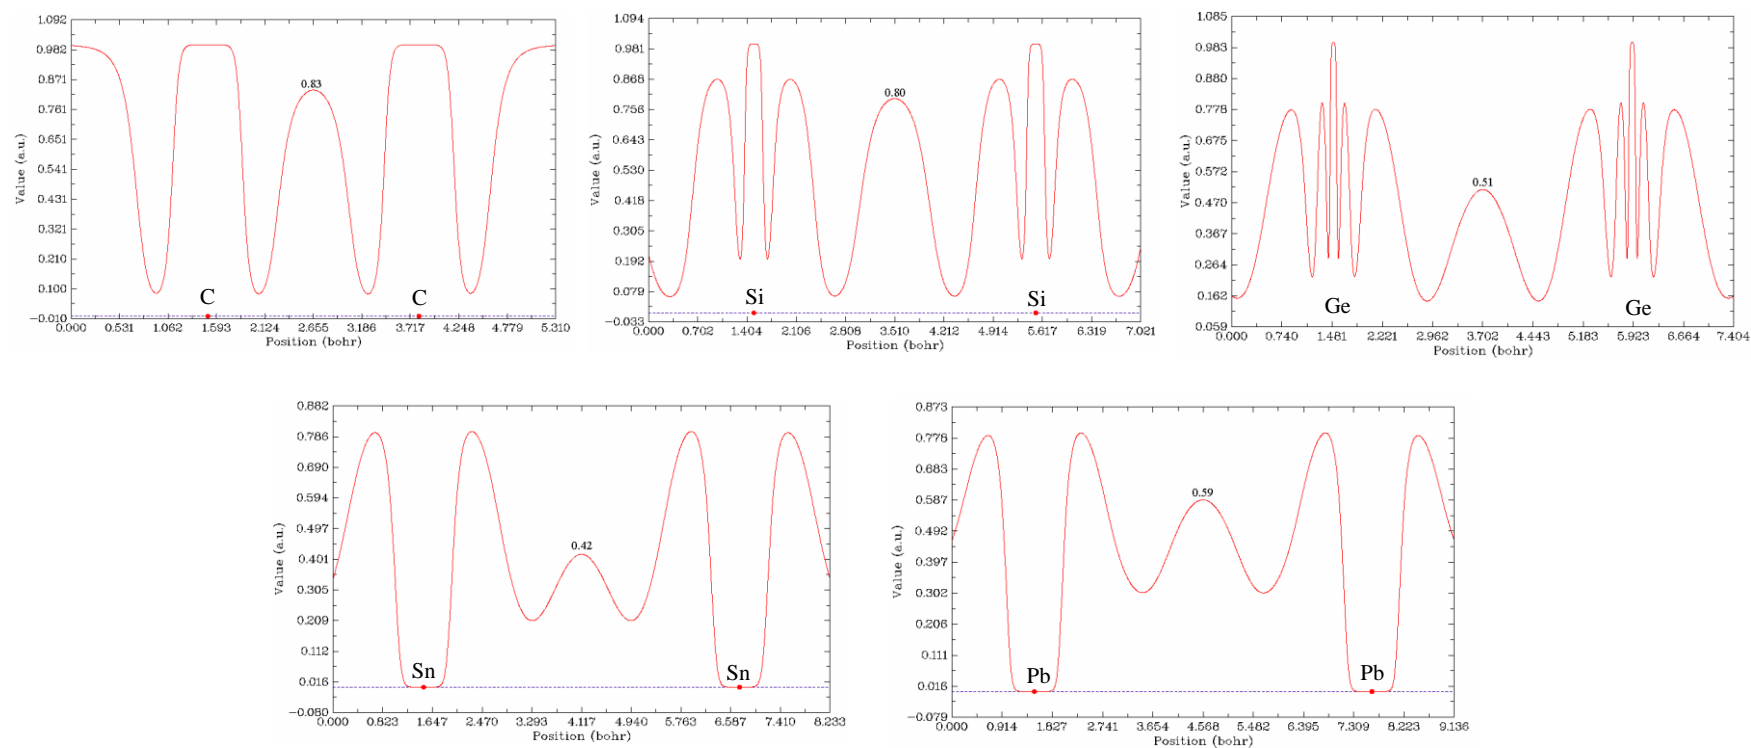

**Fig. S1.** Electron localization functions for ArEEAr ( $\text{Ar} = \text{C}_6\text{H}_3\text{-}2,6(\text{C}_6\text{H}_3\text{-}2,6\text{-Pr}^1)_2$ ,  $\text{E} = \text{C}, \text{Si}, \text{Ge}, \text{Sn}, \text{Pb}$ ) on the line connecting two E-E atoms.

**Table S1.** Cartesian coordinates of the optimized structure of ArEEAr (Ar = C<sub>6</sub>H<sub>3</sub>-2,6(C<sub>6</sub>H<sub>3</sub>-2,6-Pr<sup>i</sup>)<sub>2</sub>, E = C, Si, Ge, Sn, Pb).

ArCCAr

|   |             |             |             |
|---|-------------|-------------|-------------|
| C | 1.44403000  | -0.43922200 | 1.44236100  |
| C | 1.08916700  | -0.62515200 | 2.82604000  |
| C | 2.83888900  | -0.56339000 | 1.11121800  |
| C | 2.08008900  | -0.91448200 | 3.78805000  |
| C | 3.79012600  | -0.85955400 | 2.11025200  |
| C | 3.42981100  | -1.03633000 | 3.44821100  |
| H | 1.76873700  | -1.04075000 | 4.82067400  |
| H | 4.83121500  | -0.94821800 | 1.81400300  |
| H | 4.17796300  | -1.26169000 | 4.20341200  |
| C | -1.44751100 | 0.43084600  | -1.44273200 |
| C | -2.13540200 | -0.60990000 | -2.16240000 |
| C | -1.81354700 | 1.78573500  | -1.76313400 |
| C | -3.11439100 | -0.29011600 | -3.12671200 |
| C | -2.80072000 | 2.05276400  | -2.73517400 |
| C | -3.45977400 | 1.03075200  | -3.42284500 |
| H | -3.60527000 | -1.10734300 | -3.64717300 |
| H | -3.04505300 | 3.09027100  | -2.94319800 |
| H | -4.21829400 | 1.25664000  | -4.16757900 |
| C | -0.30487900 | -0.53459400 | 3.38885600  |
| C | -0.74318900 | 0.70031900  | 3.94956000  |
| C | -1.07435000 | -1.72237500 | 3.55760400  |
| C | -2.02848500 | 0.75961400  | 4.52909800  |
| C | -2.35311500 | -1.61827300 | 4.14569700  |
| C | -2.84143600 | -0.38257100 | 4.59966400  |
| H | -2.38523700 | 1.69586700  | 4.95165300  |
| H | -2.96127800 | -2.51066000 | 4.27240400  |
| H | -3.83426400 | -0.31819900 | 5.03962200  |
| C | 3.42987000  | -0.40398400 | -0.26509700 |
| C | 3.66217600  | -1.56406500 | -1.06039700 |
| C | 3.95882500  | 0.86080200  | -0.65571800 |
| C | 4.28649300  | -1.40804000 | -2.31639700 |

|   |             |             |             |
|---|-------------|-------------|-------------|
| C | 4.57804000  | 0.97159700  | -1.91902600 |
| C | 4.71137300  | -0.14551400 | -2.75910000 |
| H | 4.46012500  | -2.27991400 | -2.94266400 |
| H | 4.98015700  | 1.92989700  | -2.23920200 |
| H | 5.18464700  | -0.04065200 | -3.73298400 |
| C | -1.22433600 | 3.02059900  | -1.13461900 |
| C | -1.90604800 | 3.64146100  | -0.04768200 |
| C | -0.13058900 | 3.67340200  | -1.77428600 |
| C | -1.37428700 | 4.83409700  | 0.48759000  |
| C | 0.36500100  | 4.86784100  | -1.20990300 |
| C | -0.22904000 | 5.42708100  | -0.06737400 |
| H | -1.87376400 | 5.31776700  | 1.32389500  |
| H | 1.20279400  | 5.37776100  | -1.67960100 |
| H | 0.17115100  | 6.34350900  | 0.36076900  |
| C | -1.90523300 | -2.08834300 | -1.99026100 |
| C | -2.76618700 | -2.83215000 | -1.13228100 |
| C | -0.98565900 | -2.75680000 | -2.85054800 |
| C | -2.57995100 | -4.22758900 | -1.03428200 |
| C | -0.83162300 | -4.15358600 | -2.71982000 |
| C | -1.59756700 | -4.88079900 | -1.79516300 |
| H | -3.22288500 | -4.81097700 | -0.37931600 |
| H | -0.12859700 | -4.67966500 | -3.36152700 |
| H | -1.46130400 | -5.95597200 | -1.70084300 |
| C | -0.46783800 | -3.11025000 | 3.29347300  |
| C | -1.38367200 | -4.09649100 | 2.53662700  |
| C | -0.03075200 | -3.74176600 | 4.64768100  |
| H | 0.43589100  | -2.98257100 | 2.68635200  |
| H | -1.63446500 | -3.72591300 | 1.53988900  |
| H | -0.86591100 | -5.05821200 | 2.41570100  |
| H | -2.31824400 | -4.29161400 | 3.08053800  |
| H | 0.67350700  | -3.09811100 | 5.18721900  |
| H | -0.90166500 | -3.90745400 | 5.29622000  |
| H | 0.45446200  | -4.71228200 | 4.47637500  |
| C | 0.21419800  | 1.89567300  | 4.09696100  |
| C | 0.73810100  | 1.95431700  | 5.56181900  |

|   |             |             |             |
|---|-------------|-------------|-------------|
| C | -0.38158800 | 3.26493000  | 3.70548900  |
| H | 1.08098300  | 1.72698400  | 3.44799900  |
| H | 1.22928100  | 1.01891400  | 5.85480400  |
| H | 1.46451400  | 2.77072000  | 5.67435800  |
| H | -0.08783700 | 2.13531500  | 6.26273700  |
| H | -0.68336900 | 3.28484400  | 2.65599300  |
| H | -1.25245900 | 3.52675700  | 4.32124200  |
| H | 0.37324200  | 4.04965200  | 3.85211200  |
| C | 4.03754400  | 2.03263400  | 0.33741800  |
| C | 3.63476300  | 3.40862400  | -0.23590700 |
| C | 5.47950300  | 2.11119700  | 0.91959100  |
| H | 3.36014800  | 1.82339900  | 1.17327300  |
| H | 2.58903800  | 3.42128400  | -0.55119600 |
| H | 3.76088900  | 4.17904100  | 0.53724400  |
| H | 4.25854500  | 3.69755600  | -1.09236500 |
| H | 5.77800800  | 1.16682200  | 1.38966900  |
| H | 6.20627100  | 2.33782700  | 0.12795500  |
| H | 5.54231900  | 2.90397000  | 1.67729300  |
| C | 3.42040100  | -2.97798300 | -0.50376700 |
| C | 4.78143600  | -3.59375000 | -0.06488500 |
| C | 2.69816900  | -3.94692500 | -1.46491700 |
| H | 2.79813600  | -2.89355200 | 0.39428200  |
| H | 5.29635200  | -2.95820400 | 0.66533100  |
| H | 4.62411000  | -4.58021900 | 0.39217500  |
| H | 5.44740100  | -3.72152700 | -0.92882200 |
| H | 1.68904100  | -3.60018700 | -1.69772900 |
| H | 3.24537300  | -4.07679900 | -2.40810300 |
| H | 2.61246900  | -4.93573800 | -0.99369700 |
| C | -3.99209200 | -2.18064600 | -0.47053400 |
| C | -4.19800200 | -2.53436800 | 1.01851700  |
| C | -5.26898100 | -2.55295900 | -1.28026700 |
| H | -3.87682300 | -1.09195000 | -0.52789200 |
| H | -3.36107500 | -2.18950200 | 1.63070300  |
| H | -5.10894600 | -2.04538800 | 1.39045000  |
| H | -4.31761100 | -3.61540700 | 1.17166200  |

|   |             |             |             |
|---|-------------|-------------|-------------|
| H | -5.18140900 | -2.25711800 | -2.33276700 |
| H | -5.44757100 | -3.63650000 | -1.24935300 |
| H | -6.14934300 | -2.05053900 | -0.85681300 |
| C | -0.31799300 | -2.02597200 | -4.02815400 |
| C | -1.08599500 | -2.36827900 | -5.33823000 |
| C | 1.18742300  | -2.31372400 | -4.21558300 |
| H | -0.41844600 | -0.94692700 | -3.86636600 |
| H | -2.14961700 | -2.11278600 | -5.26114000 |
| H | -0.66202200 | -1.81284800 | -6.18581300 |
| H | -1.01316700 | -3.44079700 | -5.56332900 |
| H | 1.76950300  | -1.98314600 | -3.35218500 |
| H | 1.38623700  | -3.38139500 | -4.37860400 |
| H | 1.55788700  | -1.77095800 | -5.09619800 |
| C | 0.37748000  | 3.21327100  | -3.15132500 |
| C | 1.91322600  | 3.17010200  | -3.30509400 |
| C | -0.23257300 | 4.13028300  | -4.25125500 |
| H | 0.00845500  | 2.19784700  | -3.33397100 |
| H | 2.36615400  | 2.45555000  | -2.61358700 |
| H | 2.17127100  | 2.85686100  | -4.32645400 |
| H | 2.37158300  | 4.15412200  | -3.13707200 |
| H | -1.32832800 | 4.13312600  | -4.21273000 |
| H | 0.11164800  | 5.16588100  | -4.12853700 |
| H | 0.07314000  | 3.78573900  | -5.24848200 |
| C | -3.28558400 | 3.14599000  | 0.41876800  |
| C | -4.38913600 | 4.06931000  | -0.17490500 |
| C | -3.46262500 | 3.04375400  | 1.94949600  |
| H | -3.44743400 | 2.14248900  | 0.00921700  |
| H | -4.33076400 | 4.11850700  | -1.26883400 |
| H | -5.38566500 | 3.69582100  | 0.09746300  |
| H | -4.29152900 | 5.09210900  | 0.21312700  |
| H | -2.77208800 | 2.31741200  | 2.38421400  |
| H | -3.30733100 | 4.01018300  | 2.44747400  |
| H | -4.48499200 | 2.71387800  | 2.18036100  |
| C | 0.42833500  | -0.13279800 | 0.42680700  |
| C | -0.43008300 | 0.12530900  | -0.42936200 |

ArSiSiAr

|    |             |             |             |
|----|-------------|-------------|-------------|
| Si | 1.01447900  | 0.04735900  | -0.23353000 |
| Si | -1.03697200 | -0.04640700 | 0.32301100  |
| C  | 2.69174200  | -0.20645700 | 0.62675500  |
| C  | 2.90971800  | -0.45784400 | 2.01677400  |
| C  | 3.82412700  | -0.11335100 | -0.24303600 |
| C  | 4.23285100  | -0.60448800 | 2.49129600  |
| C  | 5.12861100  | -0.26450800 | 0.26620000  |
| C  | 5.33859200  | -0.50944800 | 1.63232300  |
| H  | 4.38562000  | -0.79292800 | 3.55138300  |
| H  | 5.97287000  | -0.19131900 | -0.41513100 |
| H  | 6.34689200  | -0.62481700 | 2.02223300  |
| C  | -2.70121400 | 0.20517100  | -0.58143400 |
| C  | -3.45375000 | -0.92872500 | -1.02494000 |
| C  | -3.29308600 | 1.50467900  | -0.68163900 |
| C  | -4.76021700 | -0.75198000 | -1.53026400 |
| C  | -4.60263200 | 1.64221600  | -1.19088500 |
| C  | -5.33975100 | 0.52321500  | -1.60691700 |
| H  | -5.31580800 | -1.62541200 | -1.86273100 |
| H  | -5.03667100 | 2.63684800  | -1.25777600 |
| H  | -6.35010200 | 0.64426600  | -1.99040400 |
| C  | 1.80341000  | -0.57507900 | 3.03216200  |
| C  | 1.40428200  | 0.57606100  | 3.76991400  |
| C  | 1.24411000  | -1.85334700 | 3.32295900  |
| C  | 0.42237700  | 0.43295500  | 4.77336600  |
| C  | 0.26481900  | -1.95099200 | 4.33363000  |
| C  | -0.14937100 | -0.81762400 | 5.05049900  |
| H  | 0.10702900  | 1.30218800  | 5.34557300  |
| H  | -0.17214500 | -2.91820300 | 4.56850200  |
| H  | -0.90576800 | -0.91098400 | 5.82689000  |
| C  | 3.64306200  | 0.13981200  | -1.71784600 |
| C  | 3.54590800  | -0.96648400 | -2.61551100 |
| C  | 3.63223300  | 1.47956200  | -2.21253900 |
| C  | 3.38133200  | -0.70907500 | -3.99254600 |
| C  | 3.46724900  | 1.68879600  | -3.59779900 |

|   |             |             |             |
|---|-------------|-------------|-------------|
| C | 3.32985100  | 0.60609300  | -4.48033900 |
| H | 3.29900800  | -1.54007400 | -4.68866600 |
| H | 3.45072500  | 2.70228700  | -3.99045200 |
| H | 3.19795900  | 0.78621900  | -5.54503000 |
| C | -2.56761700 | 2.76742600  | -0.29296200 |
| C | -2.68455300 | 3.28045800  | 1.03018000  |
| C | -1.84516000 | 3.48610800  | -1.28994700 |
| C | -2.03228100 | 4.49044100  | 1.34849600  |
| C | -1.20592800 | 4.69000400  | -0.92730400 |
| C | -1.28959200 | 5.18625800  | 0.38294900  |
| H | -2.10716100 | 4.89324500  | 2.35573800  |
| H | -0.64428400 | 5.24693100  | -1.67351100 |
| H | -0.78860800 | 6.11509600  | 0.64676800  |
| C | -2.90445300 | -2.33270800 | -1.00675900 |
| C | -3.13084400 | -3.17408300 | 0.12026600  |
| C | -2.24331900 | -2.83406000 | -2.16565300 |
| C | -2.64691700 | -4.49893200 | 0.08612200  |
| C | -1.77178400 | -4.16340500 | -2.15502400 |
| C | -1.96288300 | -4.98922000 | -1.03642400 |
| H | -2.80727700 | -5.15209100 | 0.94042800  |
| H | -1.25849700 | -4.55826700 | -3.02852200 |
| H | -1.59152100 | -6.01163800 | -1.04401900 |
| C | 1.74387500  | -3.12646800 | 2.62662100  |
| C | 0.60725700  | -4.08202700 | 2.19444400  |
| C | 2.75677100  | -3.87377100 | 3.53940300  |
| H | 2.28069700  | -2.83016600 | 1.71785100  |
| H | -0.12187600 | -3.57487600 | 1.55414800  |
| H | 1.02506100  | -4.92629600 | 1.62922800  |
| H | 0.07396700  | -4.50007300 | 3.05873600  |
| H | 3.61402900  | -3.23760000 | 3.79112200  |
| H | 2.27809400  | -4.18412000 | 4.47800300  |
| H | 3.13529400  | -4.77399500 | 3.03624100  |
| C | 2.06038700  | 1.94572500  | 3.54992100  |
| C | 3.04629500  | 2.26624300  | 4.70734900  |
| C | 1.03172900  | 3.08905100  | 3.37881500  |



|   |             |             |             |
|---|-------------|-------------|-------------|
| H | 2.64825100  | 1.89939800  | 2.62611000  |
| H | 3.82256400  | 1.49575100  | 4.79496300  |
| H | 3.54100600  | 3.23184100  | 4.53473800  |
| H | 2.51782300  | 2.32247400  | 5.66853500  |
| H | 0.34140100  | 2.88101700  | 2.55424000  |
| H | 0.43972600  | 3.24323500  | 4.29082000  |
| H | 1.55112900  | 4.03196100  | 3.15970900  |
| C | 3.89191200  | 2.67791000  | -1.28879500 |
| C | 2.89897500  | 3.84675700  | -1.49365700 |
| C | 5.35634800  | 3.16911300  | -1.46154700 |
| H | 3.78384200  | 2.34004100  | -0.25190400 |
| H | 1.86646700  | 3.52689000  | -1.31698900 |
| H | 3.12813700  | 4.65810000  | -0.78965800 |
| H | 2.96035000  | 4.26361000  | -2.50769500 |
| H | 6.07254600  | 2.36363600  | -1.25662400 |
| H | 5.53280500  | 3.52499200  | -2.48546300 |
| H | 5.56687400  | 3.99758400  | -0.77191000 |
| C | 3.70861200  | -2.41379300 | -2.13033200 |
| C | 5.11532000  | -2.94735800 | -2.51958600 |
| C | 2.60290100  | -3.36638300 | -2.64470500 |
| H | 3.65263000  | -2.41732500 | -1.03598400 |
| H | 5.90956800  | -2.31223800 | -2.10752500 |
| H | 5.25887400  | -3.96643200 | -2.13575800 |
| H | 5.23800100  | -2.97449200 | -3.61059000 |
| H | 1.61190100  | -3.03492000 | -2.31688700 |
| H | 2.59595500  | -3.43342900 | -3.74077000 |
| H | 2.77059200  | -4.37859700 | -2.25263200 |
| C | -3.94701400 | -2.70203300 | 1.33130700  |
| C | -3.23800800 | -2.96425600 | 2.68215400  |
| C | -5.35711000 | -3.35425700 | 1.31729100  |
| H | -4.09304500 | -1.61856400 | 1.24809400  |
| H | -2.25597900 | -2.47942800 | 2.71621600  |
| H | -3.84424900 | -2.56731500 | 3.50784700  |
| H | -3.09463500 | -4.03755600 | 2.86454800  |
| H | -5.89375300 | -3.12082800 | 0.38896100  |

|   |             |             |             |
|---|-------------|-------------|-------------|
| H | -5.28531100 | -4.44711200 | 1.39826300  |
| H | -5.95838400 | -2.98984600 | 2.16129500  |
| C | -2.09959400 | -1.99522600 | -3.44349700 |
| C | -3.08520800 | -2.50047900 | -4.53312800 |
| C | -0.65281700 | -1.96281400 | -3.99062400 |
| H | -2.37711200 | -0.96104100 | -3.21049700 |
| H | -4.12280300 | -2.46853500 | -4.17746600 |
| H | -3.01285000 | -1.87731400 | -5.43483100 |
| H | -2.85903100 | -3.53675100 | -4.81786600 |
| H | 0.04360000  | -1.57292300 | -3.24017100 |
| H | -0.30775500 | -2.96026200 | -4.29289000 |
| H | -0.59982600 | -1.31256800 | -4.87440800 |
| C | -1.80690200 | 3.02349200  | -2.75349900 |
| C | -0.37974900 | 2.99481800  | -3.35022900 |
| C | -2.74189000 | 3.91020200  | -3.62189500 |
| H | -2.19419500 | 1.99938800  | -2.79989400 |
| H | 0.28223400  | 2.34692100  | -2.76530100 |
| H | -0.41106300 | 2.60880200  | -4.37814000 |
| H | 0.06772800  | 3.99657300  | -3.38796900 |
| H | -3.77330000 | 3.88759400  | -3.24843500 |
| H | -2.40562000 | 4.95572300  | -3.61774000 |
| H | -2.74697300 | 3.55901800  | -4.66274000 |
| C | -3.55747900 | 2.59458600  | 2.09013800  |
| C | -4.87059400 | 3.39631900  | 2.30563600  |
| C | -2.82116700 | 2.37607200  | 3.43401500  |
| H | -3.84335200 | 1.60498100  | 1.71438800  |
| H | -5.43001200 | 3.50118300  | 1.36731900  |
| H | -5.51669100 | 2.88843900  | 3.03453700  |
| H | -4.65822900 | 4.40482400  | 2.68457600  |
| H | -1.91223800 | 1.78011800  | 3.29567600  |
| H | -2.53588100 | 3.32796700  | 3.90116300  |
| H | -3.47495900 | 1.84465400  | 4.13905700  |

ArGeGeAr

|    |             |             |             |
|----|-------------|-------------|-------------|
| Ge | 1.16103800  | 0.10358300  | -0.12018000 |
| Ge | -1.16044300 | -0.10290300 | -0.11940700 |
| C  | 2.56850100  | -1.30586000 | 0.05296200  |
| C  | 2.47491400  | -2.65557000 | -0.40277800 |
| C  | 3.79814900  | -0.84921600 | 0.61836500  |
| C  | 3.59192200  | -3.51051000 | -0.26645000 |
| C  | 4.89234500  | -1.73051700 | 0.74333500  |
| C  | 4.79282300  | -3.06065400 | 0.30523700  |
| H  | 3.51095300  | -4.53578000 | -0.62019700 |
| H  | 5.81888100  | -1.36457100 | 1.18017400  |
| H  | 5.64009700  | -3.73528700 | 0.40118300  |
| C  | -2.56834800 | 1.30625000  | 0.05519900  |
| C  | -2.47527300 | 2.65614700  | -0.40024700 |
| C  | -3.79767800 | 0.84913500  | 0.62101500  |
| C  | -3.59231300 | 3.51081300  | -0.26285700 |
| C  | -4.89189500 | 1.73024700  | 0.74703100  |
| C  | -4.79274400 | 3.06058100  | 0.30950900  |
| H  | -3.51185800 | 4.53614800  | -0.61653200 |
| H  | -5.81827400 | 1.36393600  | 1.18390100  |
| H  | -5.64004500 | 3.73507800  | 0.40618600  |
| C  | 1.23803200  | -3.23370500 | -1.04074900 |
| C  | 0.29965700  | -3.94651100 | -0.23856000 |
| C  | 1.06373800  | -3.14606600 | -2.45264900 |
| C  | -0.81952100 | -4.53526000 | -0.86343400 |
| C  | -0.06824000 | -3.75271000 | -3.03678100 |
| C  | -1.00752400 | -4.43608900 | -2.25053700 |
| H  | -1.54845700 | -5.07443400 | -0.26390600 |
| H  | -0.21392000 | -3.69478700 | -4.11266600 |
| H  | -1.87554000 | -4.89734500 | -2.71675200 |
| C  | 3.98686100  | 0.57678800  | 1.07799100  |
| C  | 4.49630000  | 1.54959200  | 0.16421100  |
| C  | 3.77082000  | 0.91814400  | 2.44780200  |
| C  | 4.77080400  | 2.85027400  | 0.63745700  |
| C  | 4.06437500  | 2.22888300  | 2.87695500  |

|   |             |             |             |
|---|-------------|-------------|-------------|
| C | 4.56025800  | 3.18927300  | 1.98198200  |
| H | 5.16001900  | 3.59897100  | -0.04778300 |
| H | 3.90652400  | 2.50118700  | 3.91763800  |
| H | 4.78409600  | 4.19459900  | 2.33217200  |
| C | -3.98592800 | -0.57741600 | 1.07907000  |
| C | -4.49425400 | -1.54956200 | 0.16407000  |
| C | -3.76989600 | -0.92017600 | 2.44858600  |
| C | -4.76741500 | -2.85115600 | 0.63566700  |
| C | -4.06229300 | -2.23167400 | 2.87611700  |
| C | -4.55688800 | -3.19152800 | 1.97986800  |
| H | -5.15561300 | -3.59947500 | -0.05054000 |
| H | -3.90432800 | -2.50508400 | 3.91649400  |
| H | -4.77970100 | -4.19752300 | 2.32878000  |
| C | -1.23910700 | 3.23437500  | -1.03940400 |
| C | -1.06627800 | 3.14596700  | -2.45147900 |
| C | -0.30011300 | 3.94784800  | -0.23867800 |
| C | 0.06476500  | 3.75285800  | -3.03715000 |
| C | 0.81810700  | 4.53679100  | -0.86506400 |
| C | 1.00462400  | 4.43706400  | -2.25231700 |
| H | 0.20930300  | 3.69462900  | -4.11315700 |
| H | 1.54736000  | 5.07668900  | -0.26659800 |
| H | 1.87193200  | 4.89843300  | -2.71973400 |
| C | 2.10591400  | -2.47854700 | -3.35986600 |
| C | 1.48442000  | -1.45039400 | -4.33653000 |
| C | 2.91359700  | -3.55390800 | -4.13753300 |
| H | 2.81621600  | -1.93538600 | -2.72627300 |
| H | 0.93113000  | -0.67741000 | -3.79130000 |
| H | 2.27437600  | -0.95946400 | -4.92125900 |
| H | 0.79568700  | -1.92684100 | -5.04669300 |
| H | 3.41060700  | -4.25044800 | -3.45051700 |
| H | 2.25642600  | -4.13960400 | -4.79403600 |
| H | 3.68381200  | -3.08076700 | -4.76171300 |
| C | 0.51602000  | -4.14851100 | 1.26722300  |
| C | 1.05649100  | -5.57822300 | 1.54864400  |
| C | -0.75505200 | -3.88151000 | 2.10724000  |

|   |             |             |             |
|---|-------------|-------------|-------------|
| H | 1.28248000  | -3.43894100 | 1.60021500  |
| H | 1.99972000  | -5.76071700 | 1.01951000  |
| H | 1.23561800  | -5.71674100 | 2.62367000  |
| H | 0.33432900  | -6.33910800 | 1.22331800  |
| H | -1.16248500 | -2.88359400 | 1.91162300  |
| H | -1.54682800 | -4.61166900 | 1.89621500  |
| H | -0.51901400 | -3.95261900 | 3.17798600  |
| C | 3.28104100  | -0.11370400 | 3.47168200  |
| C | 2.06232400  | 0.38899900  | 4.28548700  |
| C | 4.43715400  | -0.53562900 | 4.41864700  |
| H | 2.96162800  | -1.01010700 | 2.92839100  |
| H | 1.24320300  | 0.69142000  | 3.62214200  |
| H | 1.69281600  | -0.40920300 | 4.94327000  |
| H | 2.32227800  | 1.24644300  | 4.92036300  |
| H | 5.28082400  | -0.95128100 | 3.85353900  |
| H | 4.80745700  | 0.32253000  | 4.99523300  |
| H | 4.09278700  | -1.29898900 | 5.12935700  |
| C | 4.81821700  | 1.20173800  | -1.29555000 |
| C | 6.35284600  | 1.06895300  | -1.49557000 |
| C | 4.22144400  | 2.21780000  | -2.30063800 |
| H | 4.37753500  | 0.22410500  | -1.52170100 |
| H | 6.77434600  | 0.30113800  | -0.83493600 |
| H | 6.58145800  | 0.79015500  | -2.53309600 |
| H | 6.86144200  | 2.01795100  | -1.27899600 |
| H | 3.13895900  | 2.32461800  | -2.16461400 |
| H | 4.67644200  | 3.21161800  | -2.19289300 |
| H | 4.40757000  | 1.88085400  | -3.32942100 |
| C | -2.10925900 | 2.47771700  | -3.35730700 |
| C | -1.48832400 | 1.45125400  | -4.33612000 |
| C | -2.91996200 | 3.55256800  | -4.13250300 |
| H | -2.81750700 | 1.93301000  | -2.72270800 |
| H | -0.93289100 | 0.67857500  | -3.79269300 |
| H | -2.27877800 | 0.95979800  | -4.91971200 |
| H | -0.80165100 | 1.92924600  | -5.04722800 |
| H | -3.41683800 | 4.24774200  | -3.44400900 |

|   |             |             |             |
|---|-------------|-------------|-------------|
| H | -2.26481700 | 4.13982900  | -4.78964300 |
| H | -3.69055600 | 3.07880100  | -4.75574100 |
| C | -0.51486500 | 4.15036400  | 1.26727600  |
| C | -1.05495700 | 5.58015200  | 1.54898900  |
| C | 0.75705900  | 3.88368000  | 2.10615000  |
| H | -1.28091300 | 3.44081700  | 1.60127800  |
| H | -1.99865400 | 5.76280300  | 1.02073000  |
| H | -1.23308000 | 5.71888000  | 2.62414700  |
| H | -0.33293900 | 6.34085100  | 1.22288500  |
| H | 1.16384900  | 2.88536000  | 1.91122200  |
| H | 1.54892500  | 4.61323100  | 1.89355300  |
| H | 0.52220000  | 3.95601200  | 3.17708400  |
| C | -3.28060800 | 0.11075500  | 3.47368200  |
| C | -2.06141700 | -0.39218600 | 4.28665100  |
| C | -4.43676200 | 0.53090000  | 4.42135500  |
| H | -2.96166100 | 1.00788600  | 2.93134400  |
| H | -1.24208300 | -0.69281000 | 3.62277200  |
| H | -1.69260500 | 0.40534100  | 4.94565400  |
| H | -2.32051200 | -1.25086900 | 4.92018300  |
| H | -5.28067000 | 0.94700500  | 3.85693600  |
| H | -4.80670600 | -0.32821100 | 4.99676000  |
| H | -4.09263600 | 1.29340000  | 5.13309300  |
| C | -4.81683900 | -1.20004400 | -1.29517800 |
| C | -6.35159700 | -1.06766800 | -1.49428800 |
| C | -4.22009200 | -2.21447600 | -2.30194200 |
| H | -4.37669200 | -0.22192200 | -1.52031300 |
| H | -6.77314500 | -0.30090700 | -0.83246700 |
| H | -6.58082500 | -0.78760700 | -2.53133800 |
| H | -6.85965500 | -2.01718200 | -1.27869400 |
| H | -3.13752500 | -2.32121300 | -2.16641400 |
| H | -4.67479800 | -3.20856600 | -2.19558500 |
| H | -4.40659700 | -1.87599100 | -3.33014800 |

ArSnSnAr

|    |             |             |             |
|----|-------------|-------------|-------------|
| Sn | -1.34616100 | 0.31743600  | -0.35600200 |
| Sn | 1.34867300  | -0.32041200 | -0.35603000 |
| C  | -2.98930800 | -1.06104400 | 0.06511900  |
| C  | -3.04161600 | -2.42422700 | -0.34704400 |
| C  | -4.13675200 | -0.47788300 | 0.67800600  |
| C  | -4.22301600 | -3.17124600 | -0.14141800 |
| C  | -5.30471100 | -1.24536600 | 0.87371800  |
| C  | -5.35043100 | -2.58940300 | 0.46401200  |
| H  | -4.25327100 | -4.21172600 | -0.45842700 |
| H  | -6.17293000 | -0.78771100 | 1.34374000  |
| H  | -6.25360400 | -3.17617900 | 0.61398700  |
| C  | 2.98849500  | 1.06098600  | 0.06652600  |
| C  | 4.13524600  | 0.47640400  | 0.67971700  |
| C  | 3.04174800  | 2.42487100  | -0.34295600 |
| C  | 5.30356300  | 1.24273900  | 0.87745700  |
| C  | 4.22352300  | 3.17080200  | -0.13525600 |
| C  | 5.35027800  | 2.58741100  | 0.46993300  |
| H  | 6.17111400  | 0.78370300  | 1.34737400  |
| H  | 4.25438300  | 4.21190300  | -0.45022100 |
| H  | 6.25356400  | 3.17359300  | 0.62146600  |
| C  | -1.85620500 | -3.09697400 | -0.99265800 |
| C  | -1.66939600 | -3.01918500 | -2.40581100 |
| C  | -0.94862100 | -3.84618500 | -0.18556600 |
| C  | -0.55869000 | -3.67160200 | -2.98263800 |
| C  | 0.15182500  | -4.47635200 | -0.80401900 |
| C  | 0.35208200  | -4.38494700 | -2.19004000 |
| H  | -0.40203600 | -3.61890800 | -4.05678000 |
| H  | 0.85633800  | -5.04340100 | -0.20073000 |
| H  | 1.20772300  | -4.87477000 | -2.65003000 |
| C  | -4.11801900 | 0.96431500  | 1.12661500  |
| C  | -3.73318900 | 1.28489900  | 2.46604300  |
| C  | -4.55027500 | 1.99619300  | 0.23607100  |
| C  | -3.78031300 | 2.63094400  | 2.88509100  |
| C  | -4.58122900 | 3.32911200  | 0.70043300  |

|   |             |             |             |
|---|-------------|-------------|-------------|
| C | -4.19934500 | 3.64662200  | 2.01205300  |
| H | -3.48930700 | 2.88748200  | 3.90027400  |
| H | -4.91060000 | 4.12171600  | 0.03353000  |
| H | -4.23318300 | 4.67858900  | 2.35467600  |
| C | 1.85696400  | 3.10025400  | -0.98697200 |
| C | 1.67139300  | 3.02943200  | -2.40059900 |
| C | 0.94933400  | 3.84645400  | -0.17719400 |
| C | 0.56189900  | 3.68572000  | -2.97534400 |
| C | -0.15085000 | 4.47930800  | -0.79338700 |
| C | -0.34982100 | 4.39486200  | -2.17998600 |
| H | 0.40683200  | 3.63898700  | -4.05002100 |
| H | -0.85603500 | 5.04323500  | -0.18788700 |
| H | -1.20484500 | 4.88741800  | -2.63823800 |
| C | 4.11583600  | -0.96671900 | 1.12567100  |
| C | 4.54775100  | -1.99686000 | 0.23285100  |
| C | 3.73155900  | -1.28993800 | 2.46471000  |
| C | 4.57953900  | -3.33060000 | 0.69477900  |
| C | 3.78033100  | -2.63667600 | 2.88147500  |
| C | 4.19949200  | -3.65048300 | 2.00636000  |
| H | 4.90790400  | -4.12191400 | 0.02587700  |
| H | 3.49114600  | -2.89523700 | 3.89667300  |
| H | 4.23437600  | -4.68298400 | 2.34728700  |
| C | -1.17599100 | -4.04030200 | 1.31987300  |
| C | 0.08315700  | -3.74373300 | 2.16922700  |
| C | -1.69789300 | -5.47577800 | 1.60474500  |
| H | -1.95567900 | -3.34059300 | 1.64098500  |
| H | 0.44470500  | -2.72348200 | 1.99476700  |
| H | -0.15115300 | -3.84516200 | 3.23790200  |
| H | 0.90596400  | -4.43399500 | 1.94412600  |
| H | -2.62789400 | -5.67659100 | 1.05844400  |
| H | -0.95945500 | -6.22958200 | 1.30015900  |
| H | -1.89574300 | -5.60760200 | 2.67730100  |
| C | -2.68519100 | -2.31618400 | -3.31673100 |
| C | -3.63526700 | -3.36130500 | -3.96474100 |
| C | -2.02508800 | -1.43530000 | -4.40594900 |



|   |             |             |             |
|---|-------------|-------------|-------------|
| H | -3.30458400 | -1.65824900 | -2.69561800 |
| H | -4.16756100 | -3.94093700 | -3.20040700 |
| H | -4.38198800 | -2.86268300 | -4.59760000 |
| H | -3.07201500 | -4.06518700 | -4.59208300 |
| H | -1.32911800 | -0.71183400 | -3.96358700 |
| H | -1.47180900 | -2.03695500 | -5.13875200 |
| H | -2.79571600 | -0.87798800 | -4.95555400 |
| C | -5.04564500 | 1.68559800  | -1.18297000 |
| C | -4.43020400 | 2.61802300  | -2.25642500 |
| C | -6.59716400 | 1.74134000  | -1.23625500 |
| H | -4.74935300 | 0.66009600  | -1.43196300 |
| H | -3.33365100 | 2.59803600  | -2.22042100 |
| H | -4.74544300 | 2.29518000  | -3.25769500 |
| H | -4.75774100 | 3.65849600  | -2.12957800 |
| H | -7.04430800 | 1.03043000  | -0.53052600 |
| H | -6.96263700 | 2.74551900  | -0.98272100 |
| H | -6.95553400 | 1.49321400  | -2.24441800 |
| C | -3.34573800 | 0.19572700  | 3.47563000  |
| C | -4.53126100 | -0.08965700 | 4.43881100  |
| C | -2.06581400 | 0.53525900  | 4.27847000  |
| H | -3.14781100 | -0.72829600 | 2.92089600  |
| H | -5.42708900 | -0.39671500 | 3.88542100  |
| H | -4.27037300 | -0.89394400 | 5.13985500  |
| H | -4.78494400 | 0.80395400  | 5.02491000  |
| H | -1.21652600 | 0.72966400  | 3.61222300  |
| H | -2.20524200 | 1.41620000  | 4.91883900  |
| H | -1.79982900 | -0.30651700 | 4.93186300  |
| C | 5.04165500  | -1.68326000 | -1.18605700 |
| C | 4.43321100  | -2.61968100 | -2.25985500 |
| C | 6.59366900  | -1.72813100 | -1.23847300 |
| H | 4.73846100  | -0.65981800 | -1.43529900 |
| H | 3.33651700  | -2.60663400 | -2.22459300 |
| H | 4.74689300  | -2.29451500 | -3.26088400 |
| H | 4.76769400  | -3.65787700 | -2.13313400 |
| H | 7.03547700  | -1.01574900 | -0.53098200 |

|   |             |             |             |
|---|-------------|-------------|-------------|
| H | 6.96571500  | -2.73040400 | -0.98691900 |
| H | 6.95089200  | -1.47530900 | -2.24588600 |
| C | 3.34217800  | -0.20302000 | 3.47611100  |
| C | 4.52875000  | 0.08852200  | 4.43566300  |
| C | 2.06634800  | -0.54982700 | 4.28271000  |
| H | 3.13752600  | 0.72016600  | 2.92230900  |
| H | 5.42055000  | 0.40251900  | 3.87974500  |
| H | 4.26479800  | 0.88999700  | 5.13877000  |
| H | 4.79058600  | -0.80412400 | 5.01967500  |
| H | 1.21679100  | -0.75110300 | 3.61883800  |
| H | 2.21352100  | -1.42879600 | 4.92406900  |
| H | 1.79617100  | 0.29111500  | 4.93538000  |
| C | 1.17682600  | 4.03511300  | 1.32883500  |
| C | -0.08173200 | 3.73389900  | 2.17724600  |
| C | 1.69769400  | 5.46990600  | 1.61884800  |
| H | 1.95739400  | 3.33512800  | 1.64722000  |
| H | -0.44072100 | 2.71333400  | 1.99962500  |
| H | 0.15223700  | 3.83253300  | 3.24627400  |
| H | -0.90583300 | 4.42312800  | 1.95387300  |
| H | 2.62792900  | 5.67286400  | 1.07370900  |
| H | 0.95916000  | 6.22448900  | 1.31648700  |
| H | 1.89499500  | 5.59826100  | 2.69193500  |
| C | 2.68628400  | 2.32910700  | -3.31459800 |
| C | 3.62836700  | 3.37656400  | -3.97047100 |
| C | 2.02393300  | 1.44239400  | -4.39786400 |
| H | 3.31190100  | 1.67586100  | -2.69490300 |
| H | 4.16186700  | 3.96082700  | -3.21046500 |
| H | 4.37409300  | 2.87941800  | -4.60564900 |
| H | 3.05879100  | 4.07604200  | -4.59704600 |
| H | 1.33292100  | 0.71772800  | -3.94973600 |
| H | 1.46449000  | 2.03986000  | -5.12939000 |
| H | 2.79361200  | 0.88612000  | -4.94993700 |

ArPbPbAr

|    |             |             |             |
|----|-------------|-------------|-------------|
| Pb | -1.29069700 | 0.24351700  | 0.95838100  |
| Pb | 1.27580500  | -0.43377500 | -0.91196800 |
| C  | 3.01917800  | -0.69537300 | 0.55681200  |
| C  | 3.12384200  | -1.93850000 | 1.25006100  |
| C  | 4.13093900  | 0.19451000  | 0.60285100  |
| C  | 4.30598300  | -2.28616300 | 1.93775000  |
| C  | 5.30466900  | -0.16431700 | 1.30507300  |
| C  | 5.39929900  | -1.40286600 | 1.96313500  |
| H  | 4.37184700  | -3.24445500 | 2.44906500  |
| H  | 6.14333200  | 0.52933300  | 1.33125600  |
| H  | 6.31042300  | -1.67429100 | 2.49108800  |
| C  | -2.92308700 | 0.72990400  | -0.57790000 |
| C  | -3.84326100 | -0.19977000 | -1.14761600 |
| C  | -3.17286300 | 2.12096700  | -0.77320200 |
| C  | -4.96498200 | 0.26295400  | -1.87643900 |
| C  | -4.29317100 | 2.56331700  | -1.51113600 |
| C  | -5.19356600 | 1.63620400  | -2.06154400 |
| H  | -5.66168600 | -0.46203100 | -2.29350900 |
| H  | -4.46033700 | 3.63105000  | -1.64275000 |
| H  | -6.06045000 | 1.97766600  | -2.62236000 |
| C  | 1.93095300  | -2.86258500 | 1.22890200  |
| C  | 1.03738100  | -2.90509100 | 2.34526400  |
| C  | 1.67502600  | -3.66507200 | 0.06956300  |
| C  | -0.14030400 | -3.67609200 | 2.24295900  |
| C  | 0.47458300  | -4.41008100 | 0.00977000  |
| C  | -0.43506300 | -4.39959500 | 1.07640300  |
| H  | -0.83369700 | -3.71382500 | 3.07898800  |
| H  | 0.25390200  | -5.00790500 | -0.86945200 |
| H  | -1.36216000 | -4.96034900 | 1.00401800  |
| C  | 4.08541100  | 1.54478200  | -0.07166600 |
| C  | 4.54813800  | 1.69811800  | -1.41422500 |
| C  | 3.64632500  | 2.68316800  | 0.67039600  |
| C  | 4.55356200  | 2.98641000  | -1.99183200 |
| C  | 3.66662300  | 3.95214500  | 0.05271700  |

|   |             |             |             |
|---|-------------|-------------|-------------|
| C | 4.11522300  | 4.10557700  | -1.26796300 |
| H | 4.90991400  | 3.11662200  | -3.01059900 |
| H | 3.33870000  | 4.82601500  | 0.61056900  |
| H | 4.13261500  | 5.09178700  | -1.72725300 |
| C | -2.25875600 | 3.16967200  | -0.18042000 |
| C | -2.55631900 | 3.73426800  | 1.10018500  |
| C | -1.17000200 | 3.68338600  | -0.95417100 |
| C | -1.76278700 | 4.80042700  | 1.57812600  |
| C | -0.40542900 | 4.74981900  | -0.43608400 |
| C | -0.70046700 | 5.30803100  | 0.81709400  |
| H | -1.98416400 | 5.24171900  | 2.54641500  |
| H | 0.42269100  | 5.14849900  | -1.01547400 |
| H | -0.10546100 | 6.13512700  | 1.19796000  |
| C | -3.69102400 | -1.69692500 | -1.00467800 |
| C | -4.18092900 | -2.36034200 | 0.16218800  |
| C | -3.17340500 | -2.46155600 | -2.09455000 |
| C | -4.13295600 | -3.77025700 | 0.22062800  |
| C | -3.14463000 | -3.86905400 | -1.99291200 |
| C | -3.62044400 | -4.52225100 | -0.84661800 |
| H | -4.51594700 | -4.28421300 | 1.09882600  |
| H | -2.75968800 | -4.45912200 | -2.82136300 |
| H | -3.60367300 | -5.60889700 | -0.79069000 |
| C | 2.75602300  | -3.86864400 | -1.00738100 |
| C | 2.20769200  | -4.11942200 | -2.43110700 |
| C | 3.67948100  | -5.04619400 | -0.58107700 |
| H | 3.38203700  | -2.96909600 | -1.04484300 |
| H | 1.52774700  | -3.32087600 | -2.75263800 |
| H | 3.04009500  | -4.15935800 | -3.14577100 |
| H | 1.67199200  | -5.07516200 | -2.50233800 |
| H | 4.15269200  | -4.84781200 | 0.38743600  |
| H | 3.10548100  | -5.97882800 | -0.49708800 |
| H | 4.47370500  | -5.19820100 | -1.32449900 |
| C | 1.38268000  | -2.22099900 | 3.67648700  |
| C | 2.03862100  | -3.25498200 | 4.63714000  |
| C | 0.17995100  | -1.55363300 | 4.38470200  |

|   |             |             |             |
|---|-------------|-------------|-------------|
| H | 2.12508300  | -1.43984200 | 3.47666700  |
| H | 2.92981600  | -3.71151400 | 4.19167500  |
| H | 2.33583400  | -2.76985800 | 5.57671400  |
| H | 1.33214000  | -4.06099500 | 4.87742000  |
| H | -0.32414500 | -0.82780400 | 3.73581900  |
| H | -0.56518600 | -2.29135100 | 4.71080300  |
| H | 0.52635800  | -1.02393800 | 5.28229100  |
| C | 3.23488900  | 2.56919800  | 2.14419700  |
| C | 1.91117700  | 3.30206500  | 2.46489200  |
| C | 4.37564000  | 3.08390300  | 3.06480400  |
| H | 3.08513400  | 1.50866800  | 2.37249800  |
| H | 1.09972100  | 2.97715900  | 1.80258800  |
| H | 1.61095300  | 3.10116700  | 3.50219500  |
| H | 2.00732900  | 4.38992100  | 2.35562800  |
| H | 5.30262800  | 2.52142400  | 2.89988200  |
| H | 4.58508400  | 4.14519800  | 2.87385700  |
| H | 4.09462300  | 2.97726200  | 4.12145100  |
| C | 5.11529300  | 0.51500600  | -2.21070800 |
| C | 6.66819400  | 0.56319600  | -2.21535400 |
| C | 4.57284400  | 0.43988700  | -3.65953400 |
| H | 4.81992300  | -0.40987400 | -1.70164000 |
| H | 7.06770000  | 0.54586400  | -1.19411900 |
| H | 7.07817900  | -0.29965400 | -2.75767500 |
| H | 7.03021300  | 1.47686300  | -2.70587400 |
| H | 3.47629000  | 0.40302500  | -3.67086800 |
| H | 4.89220800  | 1.30014000  | -4.26237400 |
| H | 4.94839000  | -0.46553900 | -4.15498000 |
| C | -4.86008800 | -1.59083400 | 1.30427700  |
| C | -4.40498800 | -2.05568600 | 2.70977800  |
| C | -6.40502900 | -1.69281600 | 1.17298000  |
| H | -4.59732200 | -0.53125400 | 1.20783000  |
| H | -3.31318500 | -2.00525500 | 2.81277200  |
| H | -4.84726600 | -1.41082800 | 3.48074100  |
| H | -4.72035400 | -3.08546900 | 2.92277700  |
| H | -6.74520900 | -1.30128700 | 0.20661900  |

|   |             |             |             |
|---|-------------|-------------|-------------|
| H | -6.73636700 | -2.73706200 | 1.25224800  |
| H | -6.89814600 | -1.11724600 | 1.96817500  |
| C | -2.71282900 | -1.80402300 | -3.40321700 |
| C | -3.74600000 | -2.05540800 | -4.53588300 |
| C | -1.30659300 | -2.27306700 | -3.84926000 |
| H | -2.66150700 | -0.72156200 | -3.24223400 |
| H | -4.73620000 | -1.67101300 | -4.26357800 |
| H | -3.42941400 | -1.55693400 | -5.46210300 |
| H | -3.84686500 | -3.12878100 | -4.74556200 |
| H | -0.55778500 | -2.07524000 | -3.07271200 |
| H | -1.28492100 | -3.34708100 | -4.07614200 |
| H | -0.99987800 | -1.73687300 | -4.75746000 |
| C | -0.87457400 | 3.15577800  | -2.36422000 |
| C | 0.63641400  | 3.00520200  | -2.65831400 |
| C | -1.53012700 | 4.07324600  | -3.43418800 |
| H | -1.33377700 | 2.16446800  | -2.45752900 |
| H | 1.15258100  | 2.43611100  | -1.87252000 |
| H | 0.78460200  | 2.48383000  | -3.61285100 |
| H | 1.14277800  | 3.97534400  | -2.73207400 |
| H | -2.61612300 | 4.12782100  | -3.29908000 |
| H | -1.12590800 | 5.09280200  | -3.37240800 |
| H | -1.33111400 | 3.68780300  | -4.44338100 |
| C | -3.76315300 | 3.27184000  | 1.92846100  |
| C | -4.92978000 | 4.28966800  | 1.79950500  |
| C | -3.41696300 | 3.03251700  | 3.41933400  |
| H | -4.11608600 | 2.31952100  | 1.51584500  |
| H | -5.23283300 | 4.41299800  | 0.75295200  |
| H | -5.80328200 | 3.94557600  | 2.36966000  |
| H | -4.63676400 | 5.27462300  | 2.18724000  |
| H | -2.59144900 | 2.31712400  | 3.52558800  |
| H | -3.12997200 | 3.96216800  | 3.92806800  |
| H | -4.29009800 | 2.62575300  | 3.94689000  |
